# Supplementary material for: One-pot preparation of Bi/Bi2WO6/reduced graphene oxide as a plasmonic photocatalyst with improved activity under visible light
Source: Royal Society of Chemistry journal article supplement (doi:10.1039/c6ra20316g), 2016-01-01
Supplement: c6ra20316g1.pdf [file c6ra20316g1.pdf]

Supporting information for

**One-pot preparation of Bi/Bi<sub>2</sub>WO<sub>6</sub>/reduced graphene oxide as a plasmonic photocatalyst with improved activity under visible light<sup>†</sup>**

**Yan Zhou, Sushan Ren, Qimei Dong, Yingying Li, Hanming Ding\***

*School of Chemistry and Molecular Engineering, East China Normal University, 500 Dongchuan Road, Shanghai 200241, China*

**Synthesis of graphene oxide (GO)**

Graphite oxide (GO) was synthesized via a modified Hummers' method.<sup>1-2</sup> Briefly, 0.5 g previously oxidized graphite was reacted with a mixture of 2 g NaNO<sub>3</sub>, 12 mL concentrated H<sub>2</sub>SO<sub>4</sub> and 3 g KMnO<sub>4</sub>, followed by addition of 40 mL H<sub>2</sub>O and 10 mL H<sub>2</sub>O<sub>2</sub> (30%). The product was filtered and washed with 5% HCl solution and deionized water to obtain a light yellow powder, and dried at 60 °C for 12 h.

**Synthesis of Bi/Bi<sub>2</sub>WO<sub>6</sub>**

For the synthesis of Bi/Bi<sub>2</sub>WO<sub>6</sub>, 1g PVP (K-30) and 3.5mmol Bi(NO<sub>3</sub>)<sub>3</sub>•5H<sub>2</sub>O were dissolved in 20 mL of ethylene glycol under stirring. And then 0.5 mL Na<sub>2</sub>WO<sub>4</sub> solution (2 mol/L) was dumped into the mixture and stirred for 30 min obtain a homogeneous suspension. After that, the suspension was transferred into a Teflon-lined autoclave

---

<sup>†</sup> Electronic supplementary information (ESI) available.

with a capacity of 25 mL, and kept at 180 °C for 24 h. For the Bi/Bi<sub>2</sub>WO<sub>6</sub> composites with a controllable composition, the mass fractions of Bi can be tuned by adjusting the molar ratio of Bi(NO<sub>3</sub>)<sub>3</sub> to Na<sub>2</sub>WO<sub>4</sub> in the reaction. The molar ratios of Bi(NO<sub>3</sub>)<sub>3</sub> to Na<sub>2</sub>WO<sub>4</sub> were controlled at 1:1, 2:1, 2.5:1, 3:1, 3.5:1 and 4:1, and the resulting samples were denoted as Bi/Bi<sub>2</sub>WO<sub>6</sub>-1, Bi/Bi<sub>2</sub>WO<sub>6</sub>-2, Bi/Bi<sub>2</sub>WO<sub>6</sub>-2.5, Bi/Bi<sub>2</sub>WO<sub>6</sub>-3, Bi/Bi<sub>2</sub>WO<sub>6</sub>-3.5 and Bi/Bi<sub>2</sub>WO<sub>6</sub>-4, respectively.

### **Synthesis of Bi<sub>2</sub>WO<sub>6</sub> and Bi<sub>2</sub>WO<sub>6</sub>/rGO**

For the synthesis of Bi<sub>2</sub>WO<sub>6</sub>, 1g PVP (K-30) and 3.5mmol Bi(NO<sub>3</sub>)<sub>3</sub>•5H<sub>2</sub>O were dissolved in 20 mL of water under stirring. And then 0.5 mL Na<sub>2</sub>WO<sub>4</sub> solution (2 mol/L) was dumped into the mixture and stirred for 30 min obtain a homogeneous suspension. After that, the suspension was transferred into a Teflon-lined autoclave with a capacity of 25 mL, and kept at 180 °C for 24 h. Typically, rGO wrapped Bi<sub>2</sub>WO<sub>6</sub> composite was obtained by the similar solvothermal method. As-prepared Bi<sub>2</sub>WO<sub>6</sub>, 1g PVP and 3mg GO were dispersed in 20 mL of ethylene glycol under stirring. Then the suspension was transferred into a Teflon-lined autoclave with a capacity of 25 mL, and kept at 180 °C for 24 h. After the autoclave was cooled naturally to room temperature, the product was separated, washed with absolute ethanol and distilled water for several cycles, and dried at 60 °C in vacuum.

As shown in Fig. S1, all of the diffraction peaks can be indexed to the orthorhombic phase of Bi<sub>2</sub>WO<sub>6</sub> (marked with“•”) and the hexagonal phase of Bi

(marked with “ $\Delta$ ”), respectively. Two sets of XRD peaks of  $\text{Bi}_2\text{WO}_6$  and Bi can be clearly observed in Figure S1b-f. Meanwhile, the diffraction peak intensity ratio ( $I(\text{Bi})/I(\text{Bi}_2\text{WO}_6)$ ) between the two components increase gradually with increasing  $n(\text{Bi}(\text{NO}_3)_3) / n(\text{Na}_2\text{WO}_4)$  molar ratio, indicating that the content of Bi nanoparticles can be adjusted by changing the precursor molar ratios of  $n(\text{Bi}(\text{NO}_3)_3) : n(\text{Na}_2\text{WO}_4)$ .

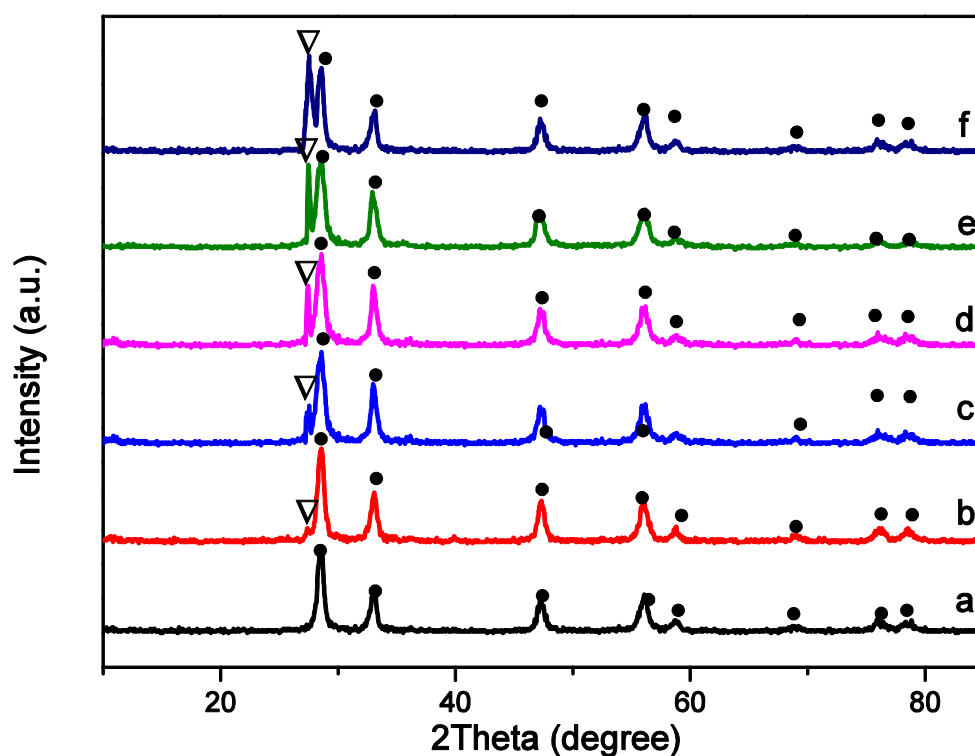

**Fig. S1** Power X-ray diffraction patterns of (a)  $\text{Bi}/\text{Bi}_2\text{WO}_6$ -1, (b)  $\text{Bi}/\text{Bi}_2\text{WO}_6$ -2, (c)  $\text{Bi}/\text{Bi}_2\text{WO}_6$ -2.5, (d)  $\text{Bi}/\text{Bi}_2\text{WO}_6$ -3 (e) BB-3.5, and (f)  $\text{Bi}/\text{Bi}_2\text{WO}_6$ -4.

Fig. S2 shows the XRD patterns of the  $\text{Bi}/\text{Bi}_2\text{WO}_6/\text{rGO}$  nanocomposites prepared with different amounts of GO. The results indicating that the presence of rGO in the reaction mixture does not influence the structure of Bi and  $\text{Bi}_2\text{WO}_6$ . No diffractions peaks corresponding to either GO or rGO has been observed in the XRD patterns of the

resultant products, probably due to its low amount and relatively low diffraction intensity.<sup>3</sup>

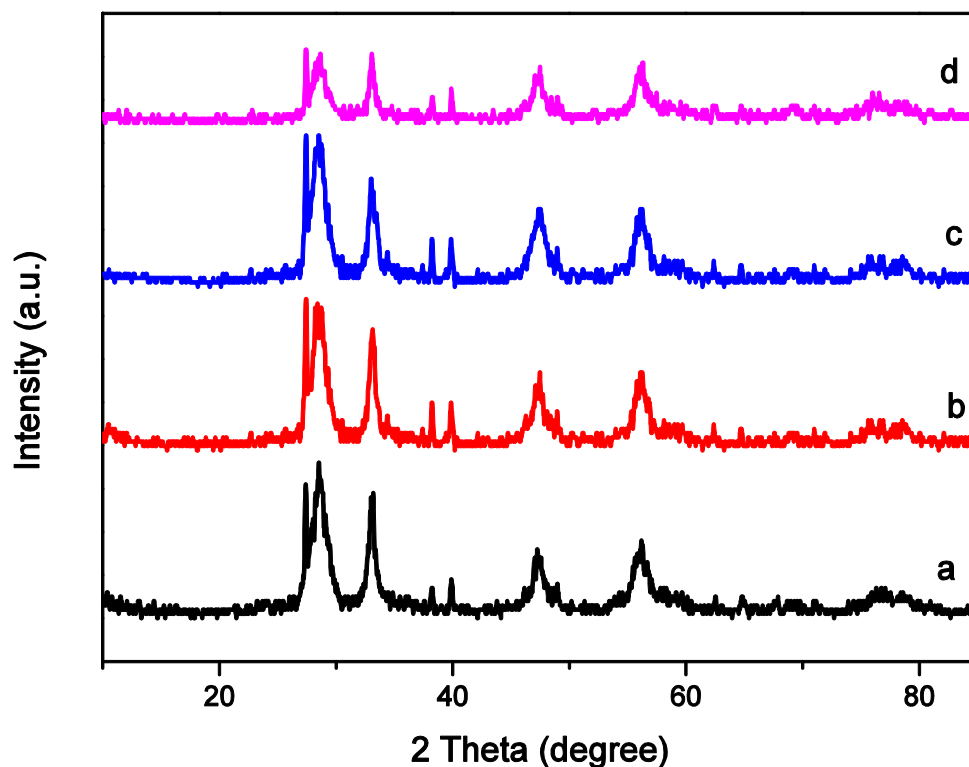

**Fig. S2** Power X-ray diffraction patterns of (a) Bi/Bi<sub>2</sub>WO<sub>6</sub>/rGO-1, (b) Bi/Bi<sub>2</sub>WO<sub>6</sub>/rGO-2, (c) Bi/Bi<sub>2</sub>WO<sub>6</sub>/rGO-3, and (d) Bi/Bi<sub>2</sub>WO<sub>6</sub>/rGO-4.

The DRS of the as-prepared Bi/Bi<sub>2</sub>WO<sub>6</sub> composites are shown in Fig. S3. The Bi/Bi<sub>2</sub>WO<sub>6</sub> composites exhibit an enhanced absorption in the visible region than Bi<sub>2</sub>WO<sub>6</sub>. Furthermore, the absorbance of the Bi/Bi<sub>2</sub>WO<sub>6</sub> composites increases especially in the visible region with increasing the molar ratio of Bi(NO<sub>3</sub>)<sub>3</sub> to Na<sub>2</sub>WO<sub>4</sub> in the precursor solutions, which is due to more Bi reduced in the Bi/Bi<sub>2</sub>WO<sub>6</sub> composites.<sup>4</sup> These results imply that the visible light response of the composites is improved by introducing Bi to the Bi<sub>2</sub>WO<sub>6</sub> nanosheets, and the phase junction is

beneficial to the separation of the photogenerated charge carriers, which subsequently results in an enhanced photocatalytic activity.

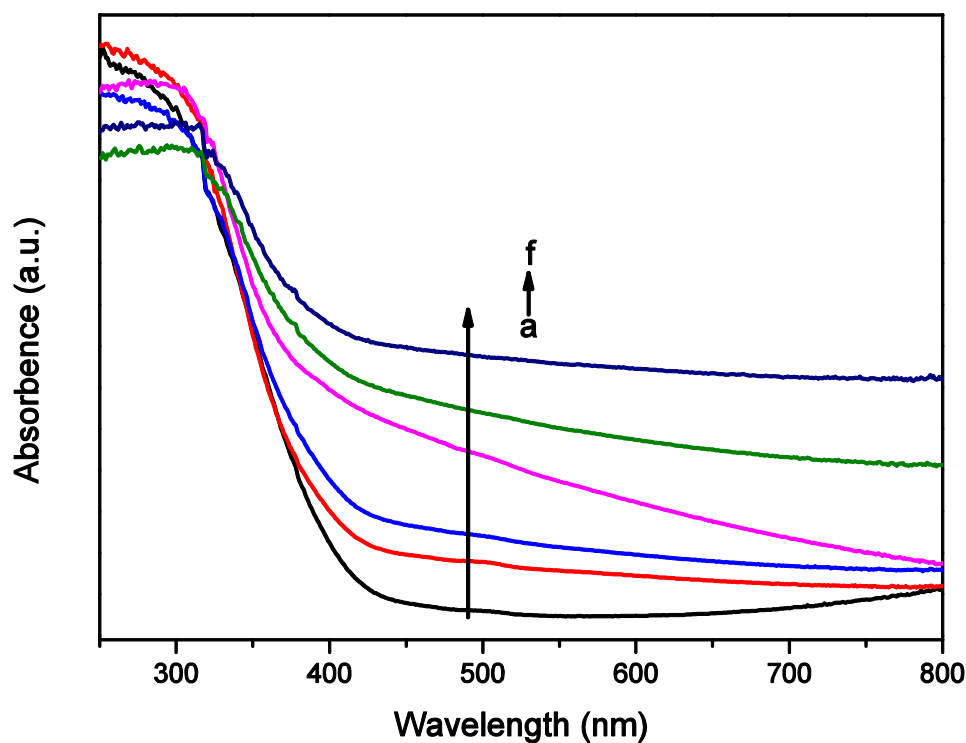

**Fig. S3** UV-vis diffuse reflectance adsorption spectra of (a) Bi/Bi<sub>2</sub>WO<sub>6</sub>-1, (b) Bi/Bi<sub>2</sub>WO<sub>6</sub>-2, (c) Bi/Bi<sub>2</sub>WO<sub>6</sub>-2.5, (d) Bi/Bi<sub>2</sub>WO<sub>6</sub>-3 (e) Bi/Bi<sub>2</sub>WO<sub>6</sub>-3.5, and (f) Bi/Bi<sub>2</sub>WO<sub>6</sub>-4.

Fig. S4 shows the photocatalytic properties of the as-prepared Bi/Bi<sub>2</sub>WO<sub>6</sub> nanocomposites under visible light irradiation. The photocatalytic activity was enhanced when  $n(\text{Bi}(\text{NO}_3)_3) / n(\text{Na}_2\text{WO}_4)$  increased from 1 to 3.5 and decreased when the molar ratio was 4. The BB-1.4 composite has the highest photocatalytic activity.

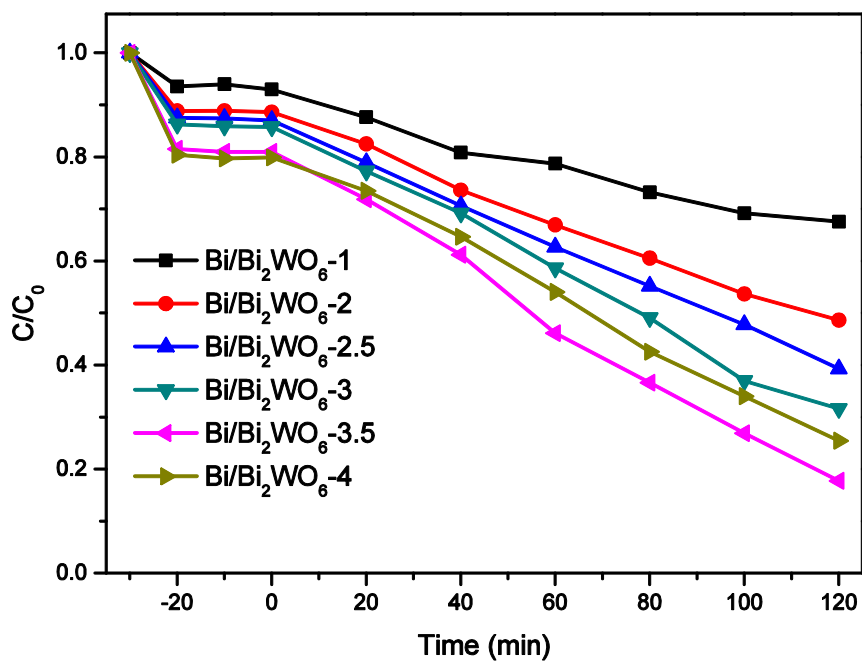

Fig. S4 Photocatalytic degradation of RhB under visible light irradiation with different photocatalysts.

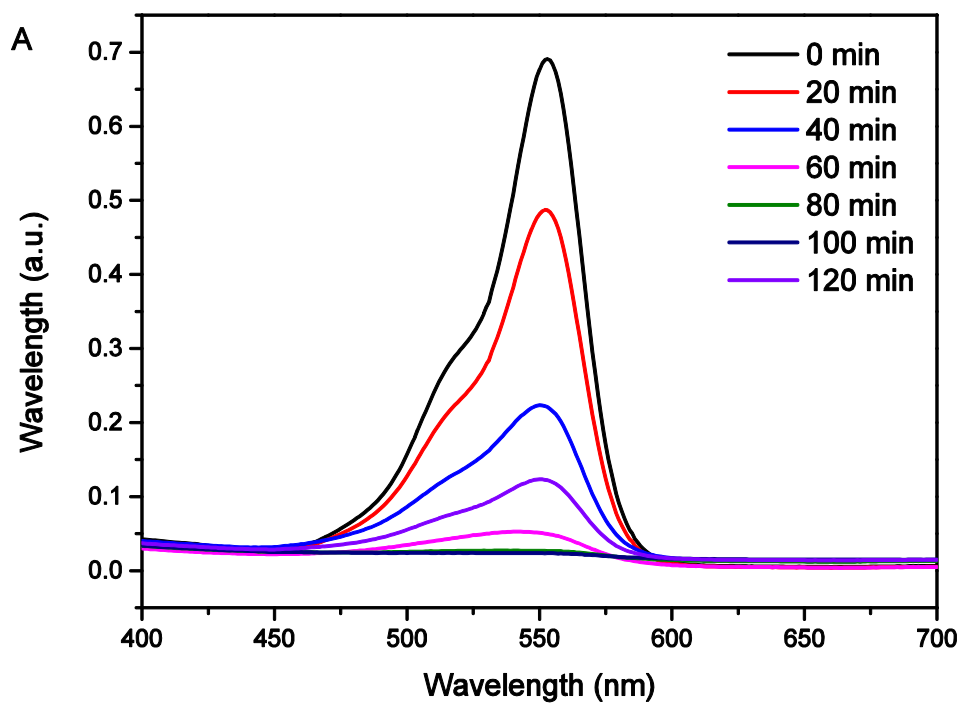

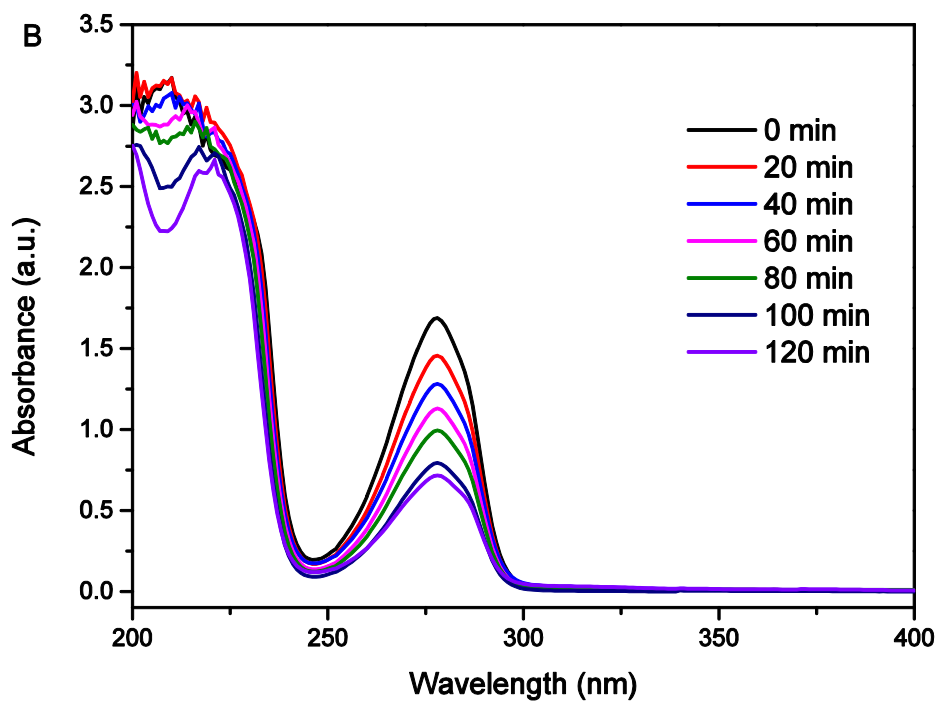

**Fig. S5** The evolution of UV-Vis spectra for RhB and 4-CP aqueous solution in the presence of Bi/Bi<sub>2</sub>WO<sub>6</sub>/rGO-3 as a function of visible light irradiation time (20 min interval between t = 0 min and t = 120 min)

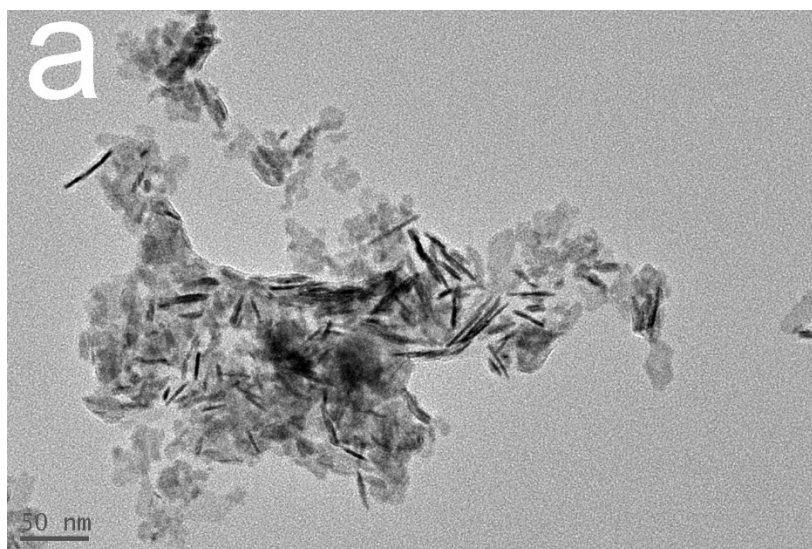

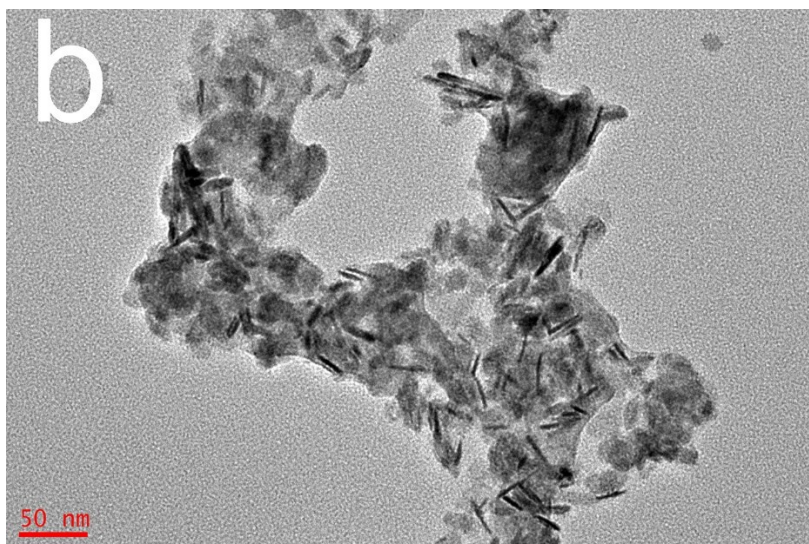

**Fig. S6** TEM images of Bi/Bi<sub>2</sub>WO<sub>6</sub>/rGO-3 measured before (a) and after a photocatalytic reaction (b)

under visible light irradiation.

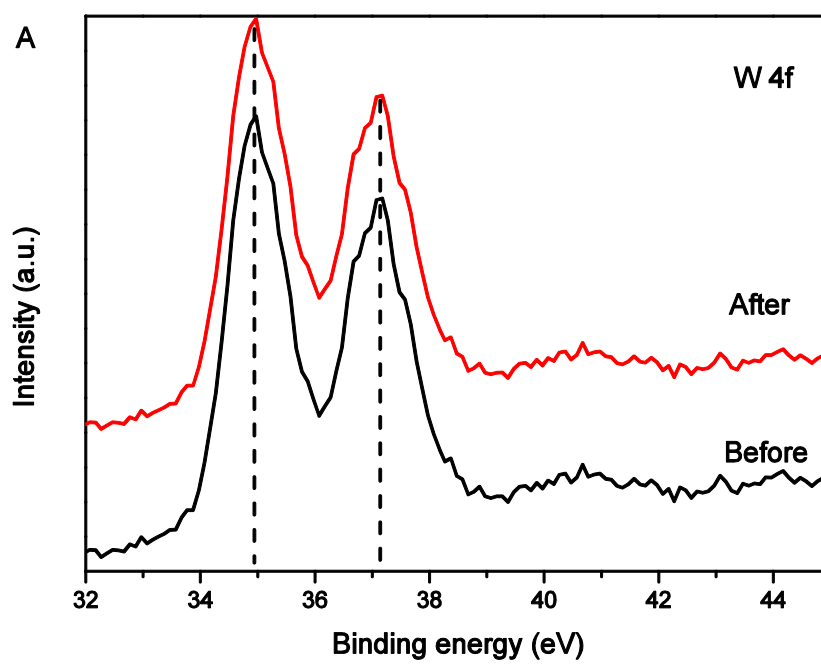



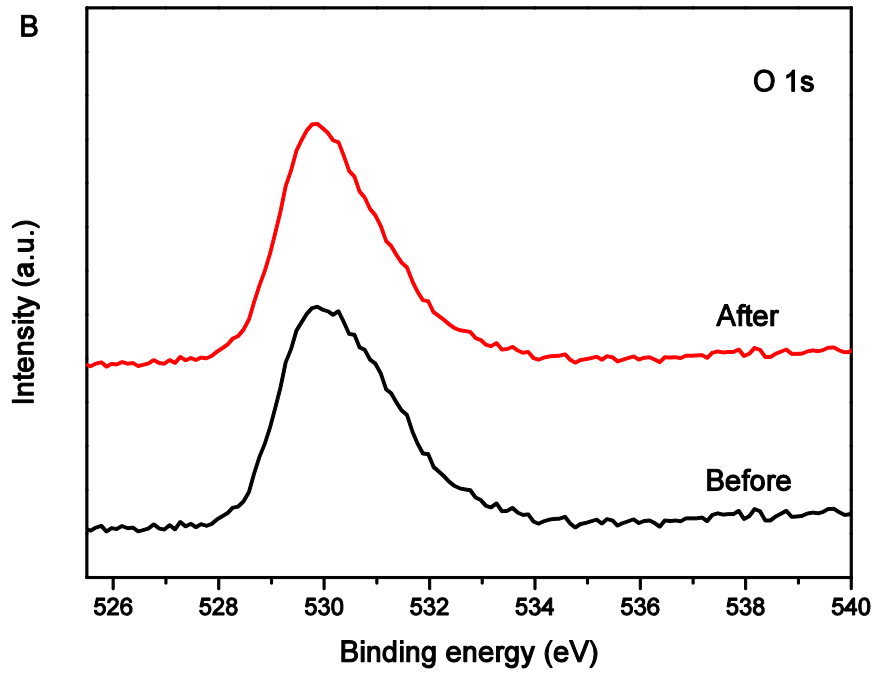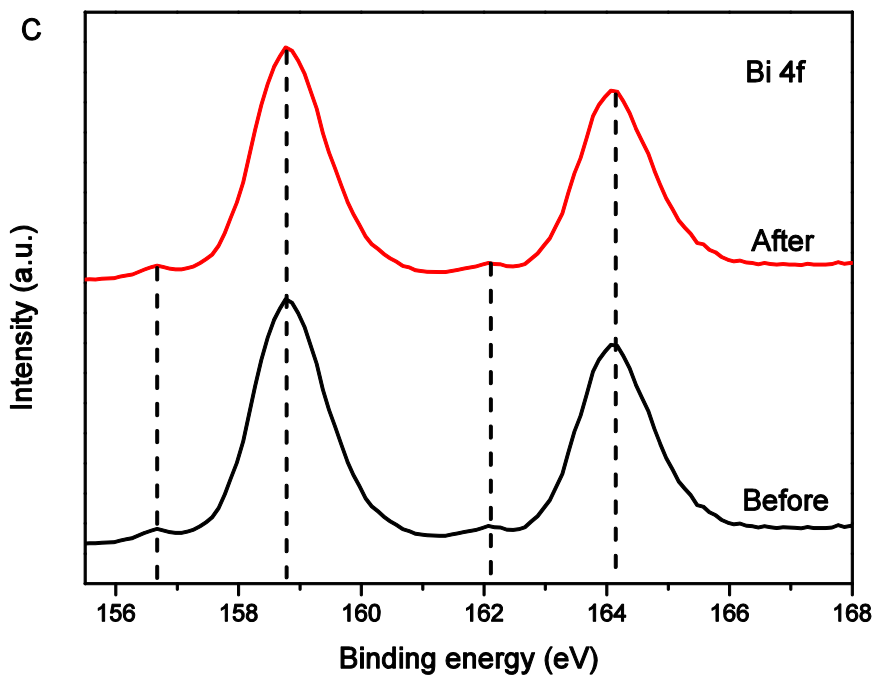

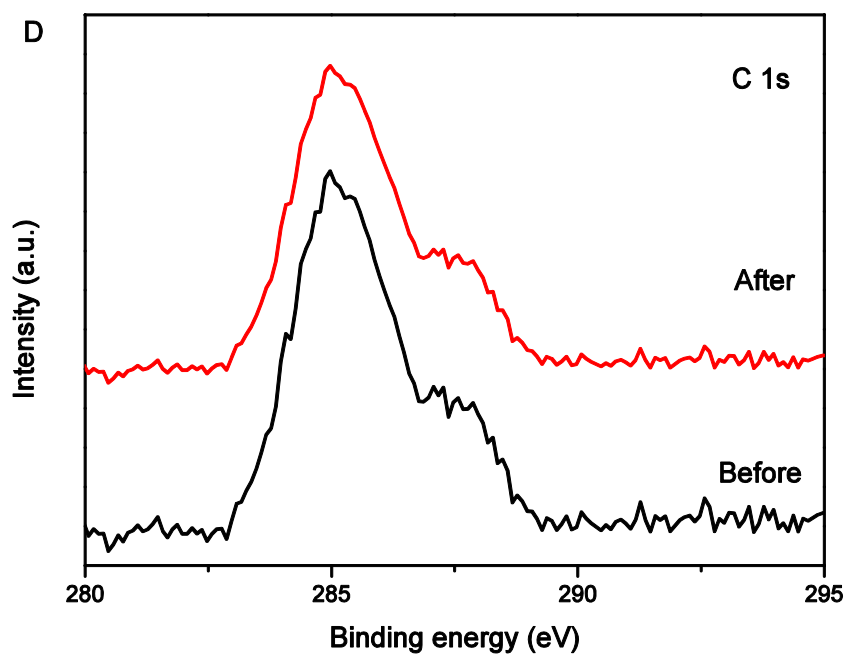

**Fig. S7** XPS of Bi/Bi<sub>2</sub>WO<sub>6</sub>/rGO-3 measured before and after a photocatalytic reaction under visible light irradiation.

#### Notes and references

1. W. S. Hummers and R. E. Offeman, *J. Am. Chem. Soc.*, 1958, **80**, 1339.
2. Kovtyukhova, P. J. Ollivier, B. R. Martin, T. E. Mallouk, S. A. Chizhik, E. V. Buzaneva and A. D. Gorchinskiy, *Chem. Mater.*, 1999, **11**, 771-778.
3. M. Wang, J. Han, H. Xiong, R. Guo and Y. Yin, *ACS Appl. Mater. Interfaces*, 2015, **7**, 6909-6918.
4. J. Li, X. Liu, L. Pan, W. Qin and Z. Suna, *RSC Adv.*, 2014, **4**, 62387-62392.
